# Psychiatric Services

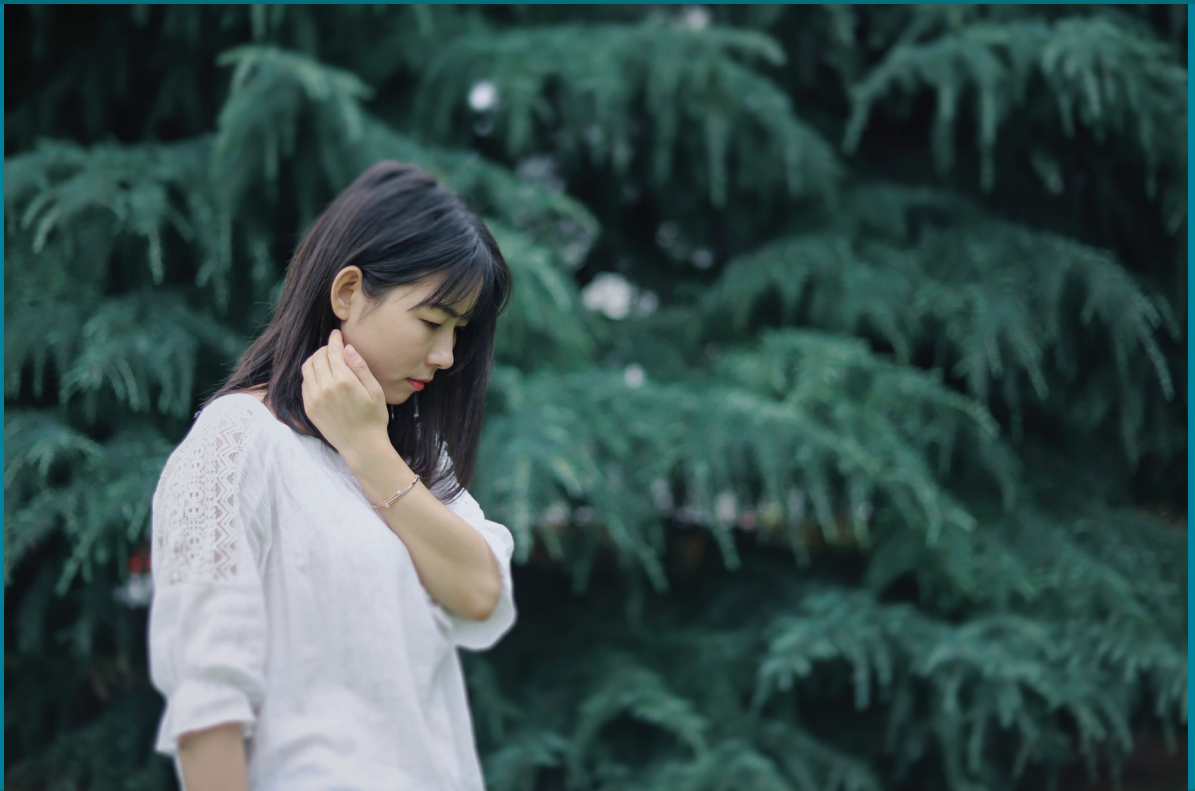

Disparities in mental health treatment for Asian Americans, 2012–2016 NSDUH

Improved health and work performance among Michigan postexpansion  
Medicaid enrollees

Better opioid treatment access but still great need within counties

Viewpoint: Cannabidiol and the importance of discussing usage with patients
