# EDITOR'S CHOICE

## Psychiatric Services

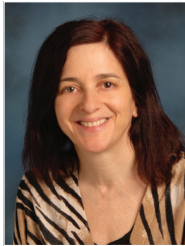

Lisa B. Dixon, M.D., M.P.H.

Collections curated by Lisa B. Dixon, M.D., M.P.H., and the Early-Career Psychiatrist Advisory Committee

Collections Editors: Carrie Cunningham, M.D., M.P.H., and Matthew L. Goldman, M.D., M.S.

Each collection focuses on one topic—summarizing for the researcher, clinician, and policy analyst the latest information and seminal research available from *Psychiatric Services*.

- Family members and caregivers
- Community-based mental health crisis services
- Early psychosis intervention
- Substance use disorders
- Mental health disparities, by race-ethnicity

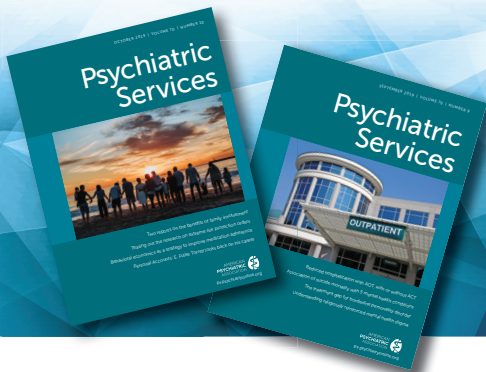

Sign up for Editor's Choice alert at <http://appi.org/etocs>.

Visit [ps.psychiatryonline.org/editorschoice](http://ps.psychiatryonline.org/editorschoice)

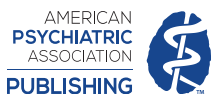

Follow @APAPubPsychSvcs

appi.org • Email: [appi@psych.org](mailto:appi@psych.org) • Toll-Free: 1-800-368-5777

AH1912A

# OUR WORK MATTERS

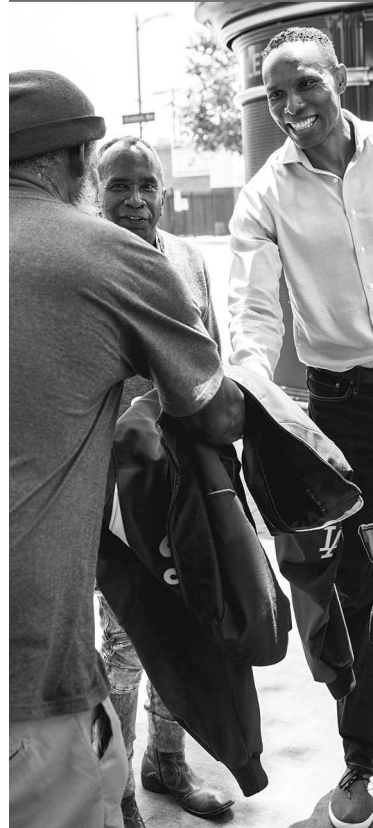

## MAKE A DIFFERENCE FOR THOSE WHO NEED IT THE MOST.

- Join the largest and most dynamic mental health department in the country
- Multiple avenues for advancement and professional development
- Flexible work schedules
- Unparalleled work-life balance
- Highly competitive benefits
- Competitive salary with potential bonuses of up to \$32,000 annually
- Student loan repayment incentive of up to \$250,000
- Reimbursement of eligible relocation costs of up to \$15,000

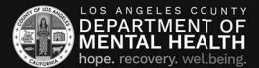

[www.psychiatristjobs.la](http://www.psychiatristjobs.la)

## Telepsychiatry and Health Technologies

### A Guide for Mental Health Professionals

Peter Yellowlees, MBBS, M.D., and Jay H. Shore, M.D., M.P.H.

This book is a practical, comprehensive, and evidence-based guide to patient-centered clinical care delivered in whole or in part by technological devices and applications. It describes basic technological concerns and emphasizes clinical issues and workflows. It is designed for psychiatrists, psychologists, and other mental health clinicians who seek to learn the modes, models, and methods of telepsychiatry.

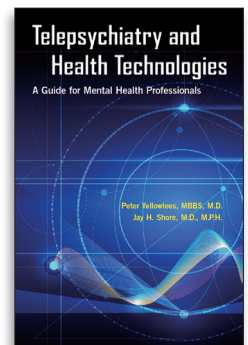

2018 • 403 pages • ISBN 978-1-61537-085-6 • Paperback • \$69.00 • Item #37085  
2018 • 403 pages • ISBN 978-1-61537-160-0 • eBook • \$55.00 • Item #37160

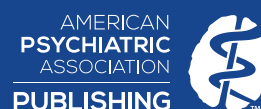

Order @ [www.appi.org](http://www.appi.org)  
Email: [appi@psych.org](mailto:appi@psych.org)  
Phone: 1-800-368-5777

AH1806A

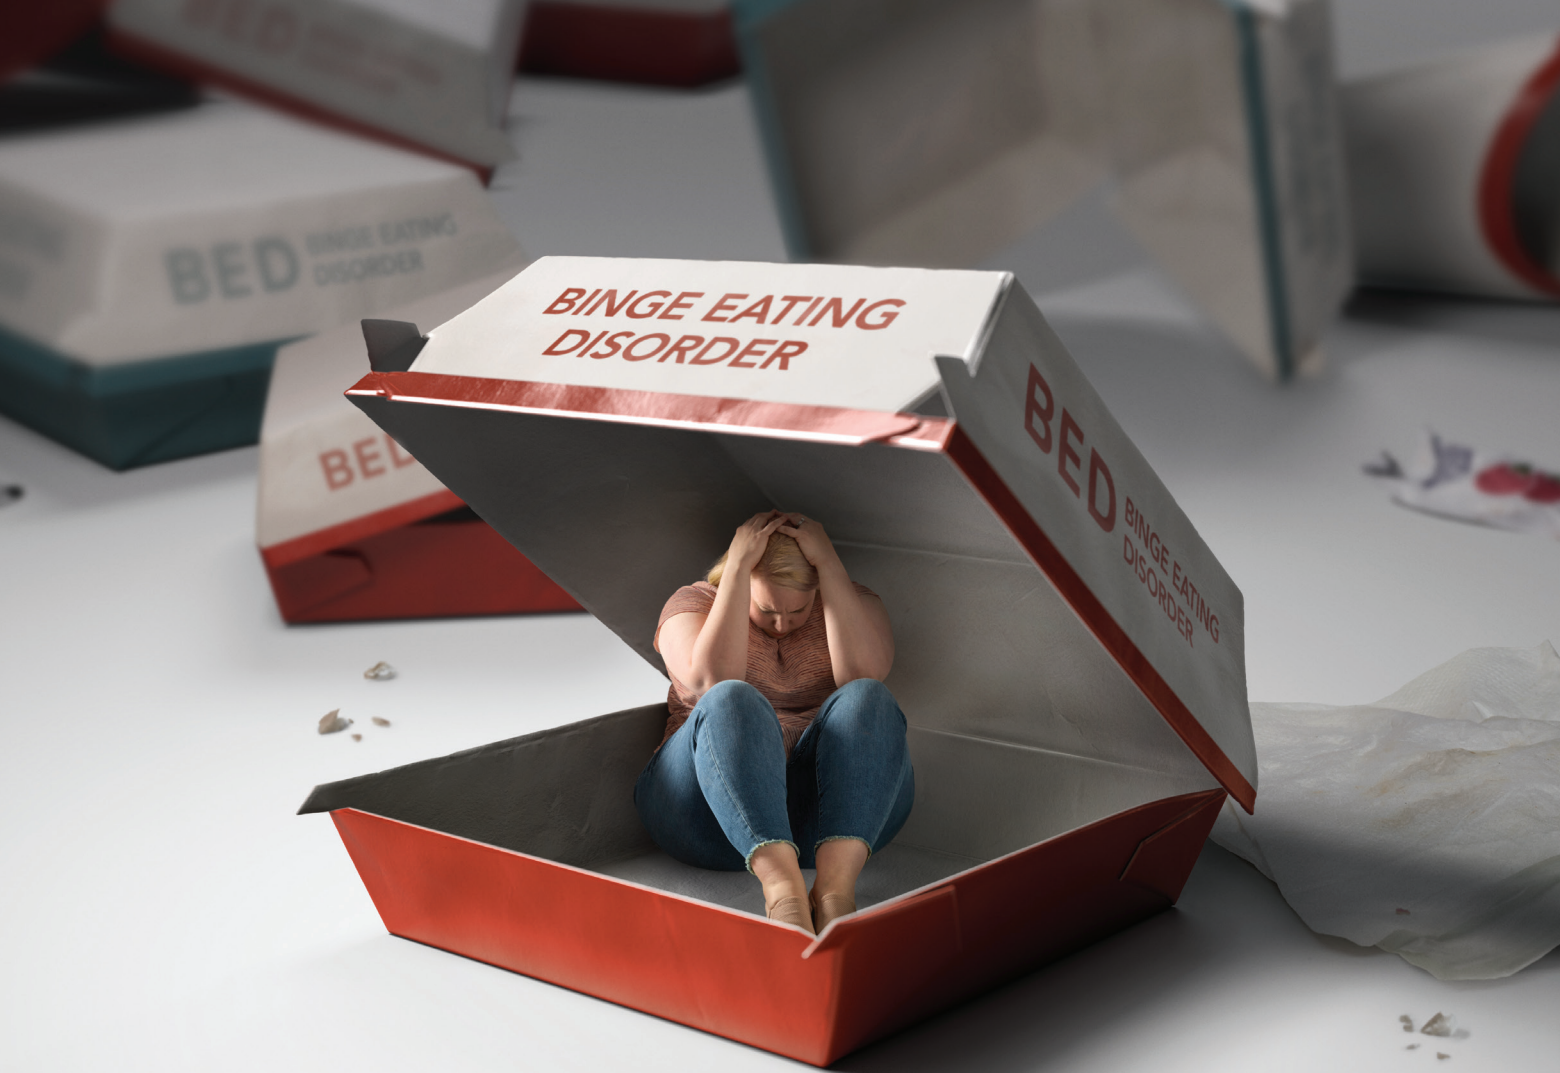

## BINGE EATING DISORDER (BED) CONSUMES HER

People with BED may feel trapped by compulsive eating behavior and obsessive thoughts around food<sup>1-3</sup>

BED is a neuropsychiatric condition that has been shown to significantly impact a patient's life, affecting both work and personal interactions.<sup>4,5</sup> But deep shame and guilt may cause people with BED to hide their symptoms<sup>4</sup>—even from their psychiatrists. Careful probing about BED symptoms may help patients feel more comfortable, so they don't shut down the conversation.<sup>6</sup>

► Visit [BurdenofBED.com](https://www.burdenofbed.com) to learn more and to download a Conversation Starter

Start the BED conversation

**References:** 1. Deal LS, Wirth RJ, Gasior M, et al. *Int J Eat Disord.* 2015;48(7):994-1004. 2. McElroy SL, Phillips KA, Keck PE, Jr. *J Clin Psychiatry.* 1994;55(10) suppl:33-51. 3. Beglin SJ, Fairburn CG. *Am J Psychiatry.* 1992;149(1):123-124. 4. American Psychiatric Association. Binge eating disorder. In: *Diagnostic and Statistical Manual of Mental Disorders, 5th ed.* Arlington, VA: American Psychiatric Association; 2013:350-353. 5. Rieger E, Wilfley DE, Stein RI, et al. *Int J Eat Disord.* 2005;37(3):234-240. 6. Kornstein SG, Keck PE Jr, Herman BK, et al. *Postgrad Med.* 2015;127(7):661-670.

SUNOVION and  are registered trademarks of Sumitomo Dainippon Pharma Co., Ltd. Sunovion Pharmaceuticals Inc. is a U.S. subsidiary of Sumitomo Dainippon Pharma Co., Ltd. © 2019 Sunovion Pharmaceuticals Inc. All rights reserved. 11/19 NPC-DAS-US-00085-19

 sunovion
