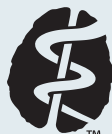

# Psychiatric Services

A Journal of the American Psychiatric Association

*Psychiatric Services*, established in 1950, is published monthly by the American Psychiatric Association for mental health professionals and others concerned with treatment and services for persons with mental illnesses and mental disabilities, in keeping with APA's objectives to improve care and treatment, to promote research and professional education in psychiatric and related fields, and to advance the standards of all psychiatric services and facilities.

## Mailing Address

*Psychiatric Services*  
American Psychiatric Association  
800 Maine Ave., S.W., Suite 900  
Washington, DC 20024  
Email: [psjournal@psych.org](mailto:psjournal@psych.org)

## Editor

Lisa B. Dixon, M.D., M.P.H.

## Editorial Board

Steven Adelsheim, M.D.  
Regina Bussing, M.D., M.S.H.S.  
Robert J. Hilt, M.D.  
Marcela Horvitz-Lennon, M.D., M.P.H.  
Roberto Lewis-Fernández, M.D.  
Hunter L. McQuiston, M.D.  
Ramin Mojtabai, M.D., Ph.D.  
Mark R. Munetz, M.D.  
Mark Olsson, M.D., M.P.H.  
David W. Oslin, M.D.  
Rebecca C. Rossom, M.D., M.S.  
Ruth S. Shim, M.D., M.P.H.  
T. Scott Stroup, M.D., M.P.H.  
Lawrence Wissow, M.D., M.P.H.

## Contributing Editors

### *Case Studies in Public-Sector*

#### *Leadership*

Jules M. Ranz, M.D., and Stephanie Le Melle, M.D.

### *Culture & Mental Health Services*

Roberto Lewis-Fernández, M.D.

### *Datapoints*

Tami L. Mark, Ph.D., and Alexander J. Cowell, Ph.D.

### *Economic Grand Rounds*

Steven S. Sharfstein, M.D., Haiden A. Huskamp, Ph.D., and Alison Evans Cuellar, Ph.D.

### *Frontline Reports*

Francine Cournos, M.D., and Stephen M. Goldfinger, M.D.

### *Global Mental Health Reforms*

Kathleen M. Pike, M.D., and Pamela Scorza, Sc.D., M.P.H.

### *Integrated Care*

Benjamin G. Druss, M.D., M.P.H., and Gail L. Daumit, M.D., M.H.S.

### *Law & Psychiatry*

Paul S. Appelbaum, M.D.

### *Personal Accounts*

Patricia E. Deegan, Ph.D., and William C. Torrey, M.D.

### *Promoting High-Value Mental Health Care*

Marcela Horvitz-Lennon, M.D., M.P.H., and Kenneth Minkoff, M.D.

### *From Pages to Practice* podcast

Josh Berezin, M.D., M.S.

### *Research, Community, & Services Partnerships*

Debra A. Pinals, M.D., and Marcia Valenstein, M.D., M.S.

### *Social Determinants of Mental Health*

Ruth S. Shim, M.D., M.P.H., and Michael T. Compton, M.D., M.P.H.

### *State Mental Health Policy*

Marvin S. Swartz, M.D.

### *Technology in Mental Health*

Dror Ben-Zeev, Ph.D.

## Early-Career Psychiatrist Advisory Committee

Hector Colon-Rivera M.D., M.R.O.

Carrie Cunningham, M.D., M.P.H.

Ayana Jordan, M.D., Ph.D.

Misty C. Richards, M.D., M.S.

Rachel Robitz, M.D.

Alan Tomás Rodríguez Penney, M.D.

Stephanie A. Rolin, M.D.

Rishi Sawhney, M.D.

*Collections Editors:* Carrie Cunningham, M.D., M.P.H., and Matthew L. Goldman, M.D., M.S.

## Editors Emeriti

Howard H. Goldman, M.D., Ph.D.

John A. Talbott, M.D.

## Statistical Consultant

Melanie M. Wall, Ph.D.

## Editorial Consultants

Dixon Chibanda, M.D., M.P.H.

Shirley M. Glynn, Ph.D.

Judith Weissman, Ph.D., J.D.

## Editorial Staff

Demarie S. Jackson

*Managing Editor*

Kathleen Stearman

*Senior Editor/Writer*

Brendan Missett

*Staff Editor*

Wendy Lieberman Taylor

*Production Manager*

Heidi A. Koch-Bubel

*Editorial Support Services Manager*

## Publisher

John McDuffie

## Editorial Director, Journals

Michael D. Roy

## American Psychiatric Association

Bruce J. Schwartz, M.D.

*President*

Jeffrey Geller, M.D., M.P.H.

*President-Elect*

Saul Levin, M.D., M.P.A.

*Chief Executive Officer and Medical Director*
