# American Psychiatric Association Publishing Journals

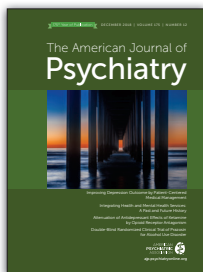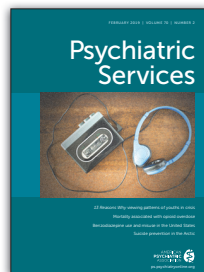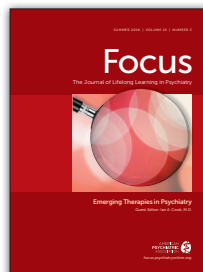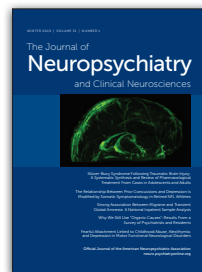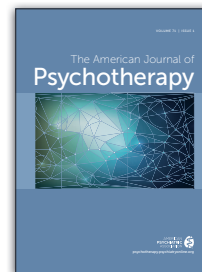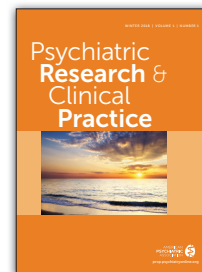

## The American Journal of Psychiatry

Official Journal of the American Psychiatric Association

**Editor-in-Chief: Ned H. Kalin, M.D.**

*The American Journal of Psychiatry* is the most widely-read psychiatric journal in the world. Published monthly, it is an indispensable journal for all psychiatrists and other mental health professionals who need to stay on the cutting edge of virtually every aspect of psychiatry. Reviews and overviews help to prepare for recertification and original research provides information on the latest advances in diagnosis, treatment, neuroscience, and patient populations.

## Focus

The Journal of Lifelong Learning in Psychiatry

**Editor: Mark Hyman Rapaport, M.D.**

*Focus* is the best system to meet the Maintenance of Certification requirements of the ABPN, self-assessment, Performance in Practice, and lifelong learning. In one subscription *Focus* provides a comprehensive review of current clinical practice based on the content outlined by the ABPN recertification exam. Each issue offers: Clinical Reviews, Patient Management Exercises, and Seminal Articles. Individual purchases of *Focus* subscriptions can earn CME credit.

## Psychiatric Services

A Journal of the American Psychiatric Association

**Editor: Lisa B. Dixon, M.D., M.P.H.**

*Psychiatric Services*, established in 1950, is published monthly by the American Psychiatric Association. The journal focuses on issues related to the delivery of mental health services, especially for people with severe mental illness in community-based treatment programs. Authors of research reports include psychiatrists, psychologists, pharmacists, and professionals in related systems, such as welfare and criminal justice systems.

## The Journal of Neuropsychiatry and Clinical Neurosciences

The Official Journal of the American Neuropsychiatric Association

**Editor: David B. Arciniegas, M.D.**

**Deputy Editor: C. Alan Anderson, M.D.**

*The Journal of Neuropsychiatry and Clinical Neurosciences* is dedicated to advancing effective diagnosis and treatment options for patients with neuropsychiatric disorders. The journal publishes peer-reviewed articles addressing critical research areas such as Alzheimer's disease, traumatic brain injury, Parkinson's disease, epilepsy, and seizure disorders, and is devoted to reporting discoveries in clinical neuroscience that are relevant to understanding the brain-based disorders of patients.

## The American Journal of Psychotherapy

**Editor: Holly A. Swartz, M.D.**

*The American Journal of Psychotherapy* is a peer-reviewed, interdisciplinary journal published quarterly by the American Psychiatric Association. Begun in 1947 by the Association for the Advancement of Psychotherapy, *The American Journal of Psychotherapy* provides a forum for advancing the theory, science, and clinical practice of psychotherapy, publishing articles that expand the understanding of psychotherapies, especially in the domains of efficacy, process, education, and practice.

## Psychiatric Research and Clinical Practice

**Edited by Kimberly A. Yonkers, M.D.**

*Psychiatric Research and Clinical Practice* (PRCP) is a new peer-reviewed, open-access journal from the American Psychiatric Association that offers a high-profile publishing destination for peer-reviewed submissions that build upon the psychiatric knowledge base and bring research findings closer to clinical utility through deeper investigation.

AMERICAN  
PSYCHIATRIC  
ASSOCIATION  
PUBLISHING

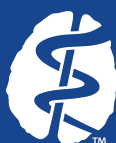

Subscribe @ [www.appi.org](http://www.appi.org)

Email: [appi@psych.org](mailto:appi@psych.org) • Toll Free: 1-800-368-5777

Priority Code AH1904
